# Supplementary material for: Indoor Microbiome and Antibiotic Resistance on Floor Surfaces: An Exploratory Study in Three Different Building Types
Source: PubMed Central journal article supplement (PMC6862025; doi:10.3390/ijerph16214160), 2019-10-28
Supplement: ijerph-16-04160-s001.pdf [file ijerph-16-04160-s001.pdf]

## Supporting Information

### **The Indoor Microbiome and Antibiotic Resistance on Floor Surfaces: An Exploratory Study in Three Different Building Types**

Mridula Gupta<sup>1§</sup>, Seungjun Lee<sup>1§</sup>, Michael Bisesi<sup>1</sup> and Jiyoung Lee<sup>1,2\*</sup>

<sup>1</sup>College of Public Health, Division of Environmental Health Sciences, The Ohio State University, Columbus, OH 43210, USA

<sup>2</sup>Department of Food Science and Technology, The Ohio State University, Columbus, OH 43210, USA

§ Equal contribution

\*Corresponding author: Jiyoung Lee. Tel: +1 614 292 5546; Fax: +1 614 293 7710

E-mail: [lee.3598@osu.edu](mailto:lee.3598@osu.edu)

**Table S1.** Concentrations of antibiotic resistance (tetracycline, sulfonamide, and KPC) and fecal bacteria from human (HF183), ruminant (Rum2Bac), dog (BacCan), and bird (GFD) sources in floor samples from each type of building (medical center, veterinary hospital, and office). The units are gene copies/25 cm<sup>2</sup>.

| Building<br>Floor<br>Traffic | Medical center |     |       |     | Veterinary hospital |      |       |     | Office building |     |       |     |
|------------------------------|----------------|-----|-------|-----|---------------------|------|-------|-----|-----------------|-----|-------|-----|
|                              | Carpet         |     | Vinyl |     | Carpet              |      | Vinyl |     | Carpet          |     | Vinyl |     |
|                              | High           | Low | High  | Low | High                | Low  | High  | Low | High            | Low | High  | Low |
| Antibiotic resistance        |                |     |       |     |                     |      |       |     |                 |     |       |     |
| <i>tetQ</i>                  | 7585           | 437 | 1862  | 339 | 72444               | 2630 | 34674 | 200 | 589             | -   | -     | -   |
| KPC                          | 117            | -   | 89    | -   | -                   | -    | -     | -   | -               | -   | -     | -   |
| <i>Sul1</i>                  | 240            | 234 | 170   | 85  | 1072                | 813  | 759   | 355 | 98              | 100 | -     | -   |
| Microbial source tracking    |                |     |       |     |                     |      |       |     |                 |     |       |     |
| HF183                        | 60             | 8   | 36    | -   | 295                 | 59   | 162   | 48  | 129             | 65  | -     | -   |
| Rum2Bac                      | 52             | 40  | 25    | -   | 2692                | 1096 | 2291  | 631 | -               | -   | -     | -   |
| Dog                          | 398            | 309 | 269   | 85  | 7413                | 5012 | 3548  | 525 | 263             | -   | 123   | -   |
| GFD                          | 63             | -   | 48    | -   | 288                 | 50   | 110   | 45  | 95              | 40  | 50    | -   |

- Not detected.

**Table S2.** Bacterial richness indices of the samples presented as mean (standard deviation)

| Factors       |         | ACE          | Chao1        | OTUs       |
|---------------|---------|--------------|--------------|------------|
| Floor type    | Carpet  | 24625 (2174) | 15667 (936)  | 6415 (217) |
|               | Vinyl   | 26016 (1446) | 16172 (518)  | 6402 (159) |
| Traffic type  | High    | 25237 (1842) | 16097 (511)  | 6548 (99)  |
|               | Low     | 25380 (2093) | 15794 (928)  | 6308 (160) |
| Building type | Medical | 25097 (2353) | 15958 (904)  | 6387 (213) |
|               | Vet     | 25603 (1569) | 16117 (442)  | 6479 (41)  |
|               | Office  | 25261 (2265) | 15685 (1010) | 6358 (251) |

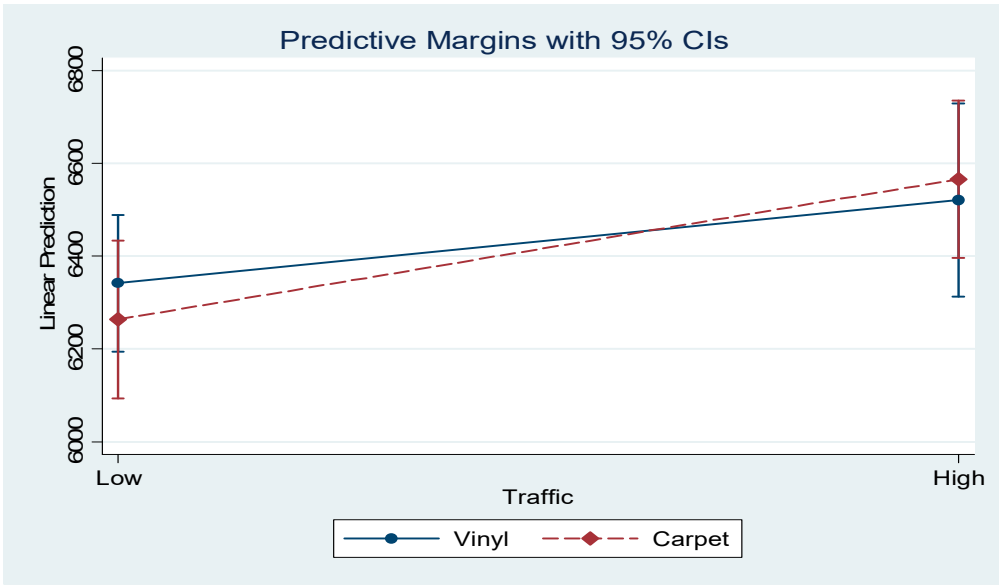

Figure S1. Predictive margins for OTU levels from floor surfaces based on traffic levels.

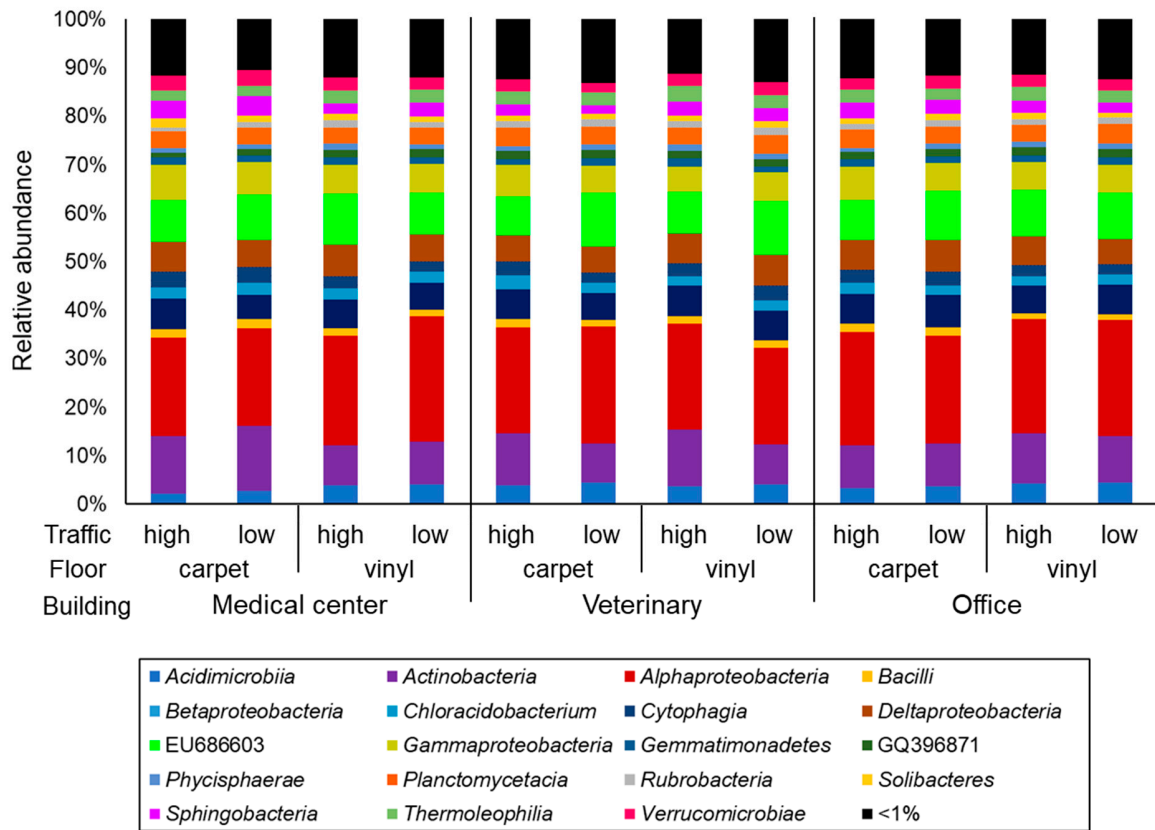

**Figure S2.** Relative abundance of bacterial community at the class level from different floor materials, traffic level, and building types.
